# Supplementary material for: Tasks and Experiences of the Prospective, Longitudinal, Multicenter MoMar (Molecular Markers) Study for the Early Detection of Mesothelioma in Individuals Formerly Exposed to Asbestos Using Liquid Biopsies
Source: Cancers (Basel). 2023 Dec 18;15(24):5896. doi: 10.3390/cancers15245896 (PMC10742125; doi:10.3390/cancers15245896)
Supplement: Supplementary file 1 [file cancers-15-05896-s001.zip]

Archive with 4 entries (4 files):
- Weber 2023 Supplementary Material S1 (Cancers).pdf
- __MACOSX/._Weber 2023 Supplementary Material S1 (Cancers).pdf
- Weber 2023 Supplementary Material S2 (Cancers).xlsx
- __MACOSX/._Weber 2023 Supplementary Material S2 (Cancers).xlsx
