# Supplementary material for: Tasks and Experiences of the Prospective, Longitudinal, Multicenter MoMar (Molecular Markers) Study for the Early Detection of Mesothelioma in Individuals Formerly Exposed to Asbestos Using Liquid Biopsies
Source: Cancers (Basel). 2023 Dec 18;15(24):5896. doi: 10.3390/cancers15245896 (PMC10742125; doi:10.3390/cancers15245896)
Supplement: Supplementary file 1 [file cancers-15-05896-s001.zip › Weber 2023 Supplementary Material S2 (Cancers).xlsx]

## Sheet: Supplemental Material S2
Supplemental Material S2: Subjects´ characteristics and concentrations of the biomarkers calretinin (ng/ml) and mesothelin (nM).
Case number	Case set	Case control status	Mesothelioma subtype	Location of Mesothelioma	Date of diagnosis	Date of blood sample	Age at blood sample	Months between blood sample and diagnosis	Smoking status	Calretinin [ng/mL]	Mesothelin [nM]
3	1	1	epithelioid	pleural mesothelioma	2010-05-11	2010-04-19	66	0.723684	never smoker	3.622	29.973
	1	0				2010-08-26	69		never smoker	0.166	1.828
	1	0				2010-01-12	70		former smoker	0.395	0.617
	1	0				2010-06-14	68		never smoker	0.157	0.703
	1	0				2010-08-26	67		never smoker	0.091	0.624
4	2	1	epithelioid	pleural mesothelioma	2018-01-04	2017-03-09	73	9.90132	former smoker	0.66	2.4105
	2	0				2016-09-13	73		never smoker	0.158	1.117
	2	0				2017-05-15	72		former smoker	0.15	0.741
	2	0				2017-05-11	75		former smoker	0.125	0.51
	2	0				2017-08-11	73		former smoker	0.094	0.905
5	3	1	biphasic	pleural mesothelioma	2011-08-11	2009-04-14	75	27.9276	former smoker	0.073	1.087
	3	0				2009-05-06	73		never smoker	0.048	1.769
	3	0				2009-07-01	71		former smoker	0.185	0.859
	3	0				2009-06-23	71		former smoker	0.264	1.28
	3	0				2009-08-25	73		former smoker	0.133	0.892
7	4	1	not known	pleural mesothelioma	2014-09-22	2011-01-10	70	44.4408	former smoker	0.359	1.211
	4	0				2011-06-21	66		never smoker	0.234	0.981
	4	0				2011-01-20	67		former smoker	0.147	0.614
	4	0				2010-11-30	70		former smoker	0.104	0.988
	4	0				2011-02-15	70		never smoker	0.087	1.251
19	5	1	epithelioid	pleural mesothelioma	2016-07-11	2015-06-15	80	12.8947	former smoker	0.271	2.944
	5	0				2015-02-27	79		former smoker	0.038	0.805
	5	0				2015-06-11	76		current smoker	0.09	0.48
	5	0				2014-12-09	77		former smoker	0.079	1.349
	5	0				2015-03-25	77		former smoker	0.288	1.538
22	6	1	epithelioid	peritoneal mesothelioma	2013-07-01	2012-09-07	74	9.76974	former smoker	0.208	2.039
	6	0				2012-05-30	73		former smoker	0.158	1.054
	6	0				2012-06-06	71		former smoker	0.041	1.472
	6	0				2013-01-15	74		former smoker	0.199	0.778
	6	0				2013-01-29	74		former smoker	0.386	0.841
6	7	1	epithelioid	pleural mesothelioma	2010-11-08	2010-10-05	69	1.11842	current smoker	0.752	3.051
	7	0				2010-05-18	70		former smoker	0.209	0.877
	7	0				2010-03-16	70		former smoker	0.14	0.856
	7	0				2010-04-27	69		former smoker	0.051	0.581
	7	0				2010-11-16	68		never smoker	0.26	2.314
21	8	1	epithelioid	pleural mesothelioma	2012-02-03	2011-10-10	64	3.81579	never smoker	0.369	1.502
	8	0				2012-05-10	62		never smoker	0.266	1.169
	8	0				2011-06-30	62		former smoker	0.127	1.106
	8	0				2011-07-14	65		former smoker	0.126	0.826
	8	0				2011-12-14	62		former smoker	0.175	1.542
14	9	1	epithelioid	pleural mesothelioma	2012-07-11	2011-12-27	73	6.48026	never smoker	0.086	1.047
	9	0				2011-06-28	72		never smoker	0.337	0.759
	9	0				2011-11-14	75		never smoker	0.066	1.196
	9	0				2011-05-31	74		former smoker	0.246	0.922
	9	0				2011-11-28	73		never smoker	0.277	0.503
8	10	1	biphasic	pleural mesothelioma	2011-10-04	2010-07-13	71	14.7368	former smoker	0.604	2.234
	10	0				2010-08-02	73		never smoker	0.259	0.75
	10	0				2010-09-20	72		former smoker	0.19	0.937
	10	0				2010-07-15	75		former smoker	0.379	1.039
	10	0				2010-07-16	71		former smoker	0.263	0.646
10	11	1	epithelioid	pleural mesothelioma	2015-03-10	2014-02-12	76	12.8618	former smoker	0.427	0.793
	11	0				2013-11-25	78		former smoker	0.725	2.435
	11	0				2014-02-26	77		former smoker	0.324	0.563
	11	0				2013-09-27	76		current smoker	0.248	1.182
	11	0				2013-12-19	79		former smoker	0.112	1.401
27	12	1	epithelioid	pleural mesothelioma	2014-08-26	2014-03-10	72	5.55921	former smoker	0.336	0.512
	12	0				2014-02-19	74		former smoker	0.329	0.217
	12	0				2014-04-07	71		former smoker	0.28	0.845
	12	0				2013-12-11	74		former smoker	0.207	1.825
	12	0				2014-08-21	75		former smoker	0.323	1.435
15	13	1	Peritoneal	peritoneal mesothelioma	2013-02-25	2012-05-30	74	8.91447	current smoker	1.88	1.815
	13	0				2012-06-21	71		never smoker	0.245	2.053
	13	0				2012-02-28	75		former smoker	0.244	0.72
	13	0				2012-04-27	71		former smoker	0.209	1.424
	13	0				2012-10-24	72		current smoker	0.104	1.274
18	14	1	epithelioid	peritoneal mesothelioma	2016-02-02	2015-06-10	74	7.79605	never smoker	0.626	8.122
	14	0				2015-06-30	71		former smoker	0.233	0.713
	14	0				2015-05-11	73		former smoker	0.65	3.308
	14	0				2015-07-28	75		former smoker	0.478	0.883
	14	0				2014-11-24	72		never smoker	0.024	0.557
1	15	1	epithelioid	pleural mesothelioma	2017-05-05	2016-09-30	73	7.13816	former smoker	0.333	1.3365
	15	0				2017-01-23	71		former smoker	0.172	0.774
	15	0				2016-08-26	73		never smoker	0.272	1.411
	15	0				2016-10-28	75		current smoker	0.16	2.033
	15	0				2016-05-25	72		former smoker	0.333	1.408
12	16	1	sarcomatoid	pleural mesothelioma	2017-07-19	2016-11-03	76	8.48684	former smoker	0.191	0.897
	16	0				2016-11-29	80		never smoker	0.068	0.704
	16	0				2017-03-21	76		former smoker	0.214	1.061
	16	0				2016-04-28	77		former smoker	0.087	0.815
	16	0				2016-11-17	79		former smoker	0.329	1.514
32	17	1	biphasic	pleural mesothelioma	2013-11-12	2013-07-18	79	3.84868	never smoker	0.704	1.359
	17	0				2013-10-29	80		former smoker	0.048	1.628
	17	0				2012-12-18	80		current smoker	0.198	0.604
	17	0				2013-01-18	80		former smoker	0.156	1.516
	17	0				2013-04-16	80		former smoker	0.4543	0.686
34	18	1	biphasic	pleural mesothelioma	2012-05-04	2011-09-09	75	7.82895	current smoker	0.174	2.978
	18	0				2011-11-29	73		never smoker	0.159	1.172
	18	0				2011-11-24	73		former smoker	0.109	0.576
	18	0				2011-05-02	72		never smoker	0.122	0.614
	18	0				2012-03-26	72		never smoker	0.075	1.289
30	19	1	epithelioid	pleural mesothelioma	2012-10-23	2011-08-11	66	14.4408	former smoker	0.123	0.548
	19	0				2011-03-24	68		never smoker	0.407	1.401
	19	0				2011-05-11	70		former smoker	0.107	0.883
	19	0				2011-04-01	66		former smoker	0.129	1.178
	19	0				2011-11-29	69		current smoker	0.162	0.924
31	20	1	sarcomatoid	pleural mesothelioma	2013-12-05	2013-06-03	72	6.08553	former smoker	0.429	0.884
	20	0				2013-06-25	74		former smoker	0.229	1.473
	20	0				2013-10-25	74		never smoker	0.359	0.62
	20	0				2013-02-12	75		former smoker	0.26	1.091
	20	0				2013-06-14	73		former smoker	0.34	1.857
29	21	1	epithelioid	pleural mesothelioma	2012-06-04	2011-08-31	80	9.14474	never smoker	0.094	1.054
	21	0				2011-10-17	79		former smoker	0.37	2.696
	21	0				2012-02-28	80		former smoker	0.428	1.018
	21	0				2011-10-19	77		former smoker	0.518	0.82
	21	0				2011-10-17	76		former smoker	0.208	0.841
33	22	1	epithelioid	peritoneal mesothelioma	2011-12-16	2011-08-25	71	3.71711	former smoker	6.629	8.353
	22	0				2011-04-28	75		former smoker	0.248	2.302
	22	0				2012-03-01	75		former smoker	0.647	1.497
	22	0				2011-05-25	74		former smoker	0.026	0.699
	22	0				2012-03-16	71		current smoker	0.139	2.629
43	23	1	epithelioid	pleural mesothelioma	2015-03-09	2015-01-28	77	1.31579	former smoker	0.36	1.103
	23	0				2014-09-15	76		never smoker	0.065	0.495
	23	0				2015-07-03	80		current smoker	0.136	1.795
	23	0				2015-03-12	78		never smoker	0.189	1.913
	23	0				2014-10-21	78		never smoker	0.323	1.571
26	24	1	epithelioid	pleural mesothelioma	2019-01-20	2017-12-15	84	13.1908	former smoker	0.039	2.205
	24	0				2017-05-26	85		never smoker	0.389	2.501
	24	0				2017-05-29	84		never smoker	0.483	3.005
	24	0				2017-10-25	83		former smoker	0.255	0.618
	24	0				2017-10-18	81		never smoker	0.183	1.398
25	25	1	epithelioid	pleural mesothelioma	2012-05-07	2012-04-13	75	0.789474	former smoker	0.206	1.259
	25	0				2012-11-07	71		former smoker	0.112	1.203
	25	0				2012-08-28	73		former smoker	0.158	0.619
	25	0				2012-10-18	75		former smoker	0.068	0.629
	25	0				2012-08-14	75		former smoker	0.436	1.156
20	26	1	epithelioid	pleural mesothelioma	2016-06-28	2015-12-07	77	6.71053	current smoker	0.393	1.123
	26	0				2015-07-15	80		former smoker	0.198	0.824
	26	0				2015-07-06	79		former smoker	0.101	1.506
	26	0				2016-02-29	78		former smoker	0.036	1.036
	26	0				2016-04-07	80		never smoker	0.427	0.945
40	27	1	epithelioid	pleural mesothelioma	2015-01-19	2014-02-07	66	11.3816	former smoker	0.301	0.764
	27	0				2013-09-26	66		former smoker	0.226	0.944
	27	0				2014-06-17	69		current smoker	0.507	0.761
	27	0				2014-07-29	67		former smoker	0.362	0.392
	27	0				2014-07-10	66		former smoker	0.18	0.587
35	28	1	epithelioid	pleural mesothelioma	2014-09-16	2012-07-19	65	25.9539	former smoker	0.254	0.349
	28	0				2012-11-22	63		current smoker	0.094	0.777
	28	0				2012-07-30	63		former smoker	0.29	0.83
	28	0				2012-05-07	63		former smoker	0.081	1.428
	28	0				2012-08-30	65		former smoker	0.151	1.963
37	29	1	epithelioid	pleural mesothelioma	2012-09-19	2012-08-22	76	0.921053	current smoker	0.58	2.08
	29	0				2012-01-23	76		former smoker	0.113	0.463
	29	0				2013-03-12	76		never smoker	0.173	0.471
	29	0				2012-04-11	79		former smoker	0.135	0.487
	29	0				2013-01-16	80		never smoker	0.183	1.235
9	30	1	sarcomatoid	pleural mesothelioma	2014-04-23	2013-08-22	71	8.02632	former smoker	0.321	1.693
	30	0				2013-07-16	71		former smoker	0.171	1.241
	30	0				2014-03-21	74		former smoker	0.197	1.343
	30	0				2013-03-22	75		current smoker	0.046	0.724
	30	0				2013-04-10	74		never smoker	0.5	0.617
42	31	1	biphasic	pleural mesothelioma	2015-12-27	2015-09-04	79	3.75	former smoker	0.316	3.17
	31	0				2015-09-29	79		former smoker	0.183	1.876
	31	0				2015-09-01	77		former smoker	0.118	0.909
	31	0				2015-08-18	78		former smoker	0.094	0.662
	31	0				2016-02-19	77		former smoker	0.224	0.791
16	32	1	epithelioid	pleural mesothelioma	2015-02-06	2012-09-06	80	29.0461	never smoker	0.326	0.994
	32	0				2012-04-26	76		former smoker	0.136	0.662
	32	0				2012-11-19	77		former smoker	0.131	1.069
	32	0				2013-03-13	80		never smoker	0.418	0.982
	32	0				2012-08-07	79		current smoker	0.332	2.131
17	33	1	sarcomatoid	pleural mesothelioma	2014-02-15	2013-12-16	75	2.00658	never smoker	0.067	1.729
	33	0				2013-05-21	74		former smoker	0.189	0.703
	33	0				2013-09-02	74		former smoker	0.029	1.625
	33	0				2013-11-29	73		current smoker	0.323	0.757
	33	0				2013-09-25	74		former smoker	0.084	0.182
11	34	1	not known	pleural mesothelioma	2015-10-28	2014-10-31	83	11.9079	former smoker	0.43	2.91
	34	0				2014-10-07	84		former smoker	0.194	0.818
	34	0				2014-11-05	81		former smoker	0.143	1.059
	34	0				2015-05-07	82		former smoker	0.287	2.574
	34	0				2014-06-12	81		never smoker	0.38	2.025
38	35	1	epithelioid	pleural mesothelioma	2016-08-03	2015-12-09	76	7.82895	former smoker	3.218	0.873
	35	0				2015-11-18	80		never smoker	0.285	1.232
	35	0				2015-07-14	78		former smoker	0.125	1.301
	35	0				2015-11-30	79		former smoker	0.273	2.221
	35	0				2016-07-06	77		former smoker	0.305	0.525
39	36	1	epithelioid	peritoneal mesothelioma	2018-12-23	2017-11-08	72	13.4868	never smoker	0.099	1.2565
	36	0				2017-06-14	73		former smoker	0.131	1.651
	36	0				2017-04-24	73		current smoker	0.109	2.006
	36	0				2017-06-29	73		never smoker	0.299	1.181
	36	0				2017-12-01	74		never smoker	0.31	1.204
36	37	1	epithelioid	pleural mesothelioma	2018-07-01	2017-01-25	67	17.1711	former smoker	0.066	0.966
	37	0				2016-11-10	70		former smoker	0.207	0.979
	37	0				2017-04-05	69		never smoker	0.228	1.406
	37	0				2016-08-02	66		former smoker	0.054	0.929
	37	0				2016-09-07	69		former smoker	0.138	0.611
13	38	1	epithelioid	pleural mesothelioma	2017-12-27	2017-05-30	77	6.94079	never smoker	0.405	0.808
	38	0				2017-06-21	76		former smoker	0.09	1.317
	38	0				2017-01-24	80		never smoker	0.091	0.712
	38	0				2017-11-22	78		former smoker	0.161	1.084
	38	0				2017-11-28	76		former smoker	0.445	2.153
23	39	1	epithelioid	peritoneal mesothelioma	2016-06-06	2015-08-28	72	9.30921	former smoker	0.42	0.885
	39	0				2015-12-16	72		former smoker	0.008	0.459
	39	0				2015-04-17	72		former smoker	0.147	1.066
	39	0				2015-07-21	71		never smoker	0.237	1.08
	39	0				2015-09-09	73		never smoker	0.025	1.649
2	40	1	epithelioid	pleural mesothelioma	2018-12-04	2017-10-26	64	13.2895	former smoker	0.012	1.487
	40	0				2017-05-12	61		former smoker	0.198	0.903
	40	0				2017-04-13	65		current smoker	0.066	2.097
	40	0				2018-01-31	62		current smoker	0.214	2.386
	40	0				2017-11-08	62		never smoker	0.127	2.173
41	41	1	biphasic	peritoneal mesothelioma	2015-07-10	2015-03-05	73	4.17763	former smoker	0.993	1.349
	41	0				2015-08-28	73		former smoker	0.042	0.307
	41	0				2015-01-26	73		former smoker	0.143	1.864
	41	0				2015-09-14	73		former smoker	0.348	0.989
	41	0				2015-04-15	72		never smoker	0.137	2.823
28	42	1	epithelioid	pleural mesothelioma	2015-05-05	2014-05-02	73	12.1053	former smoker	1.05	1.68
	42	0				2014-04-29	71		former smoker	0.212	0.757
	42	0				2014-11-25	71		never smoker	0.305	0.929
	42	0				2013-12-16	73		former smoker	0.227	0.804
	42	0				2013-10-18	75		never smoker	0.183	0.677
24	43	1	sarcomatoid	pleural mesothelioma	2019-01-08	2017-11-10	80	13.9474	former smoker	0.135	0.479
	43	0				2017-07-20	80		former smoker	0.139	1.069
	43	0				2017-08-31	77		former smoker	0.172	0.855
	43	0				2017-05-23	78		former smoker	0.272	2.106
	43	0				2017-12-22	77		former smoker	0.207	1.674
